# Supplementary material for: Proton Radiation Therapy for Nasopharyngeal Cancer Patients: Dosimetric and NTCP Evaluation Supporting Clinical Decision
Source: MDPI journal article supplement (doi:10.3390/cancers14051109), 2022-02-22
Supplement: s1 [file s1]

## Supplementary Materials

Table S1: Dose volume points for IMPT and VMAT plans and relative difference.

|                      | Protons<br>[Gy(RBE)]         |   |     |          | Protons<br>[Gy(RBE)] |          |      |          | $\Delta$ p-X<br>[Gy(RB<br>E)] | $\Delta$<br>p-<br>X<br>[%<br>]   |   | Protons<br>[Gy(RBE)]             |          |   |          | Protons<br>[Gy(RBE)] |          |  |  | $\Delta$ p-X<br>[Gy(RB<br>E)] | $\Delta$<br>p-<br>X<br>[%<br>] |
|----------------------|------------------------------|---|-----|----------|----------------------|----------|------|----------|-------------------------------|----------------------------------|---|----------------------------------|----------|---|----------|----------------------|----------|--|--|-------------------------------|--------------------------------|
|                      |                              |   |     |          |                      |          |      |          |                               |                                  |   |                                  |          |   |          |                      |          |  |  |                               |                                |
|                      | PTV <sub>HD</sub>            |   |     |          |                      |          |      |          |                               |                                  |   | PTV <sub>LD_1,8-2,1Gy(RBE)</sub> |          |   |          |                      |          |  |  |                               |                                |
| D <sub>99</sub><br>% | 67,<br>4                     | ± | 1,2 | 67,<br>8 | ±                    | 13,<br>1 | -0,4 | -<br>0,6 | D <sub>99</sub><br>%          | 57,<br>2                         | ± | 2,4                              | 58,<br>6 | ± | 2,6      | -1,4                 | -<br>2,4 |  |  |                               |                                |
| D <sub>98</sub><br>% | 68,<br>1                     | ± | 0,5 | 68,<br>2 | ±                    | 0,9      | -0,1 | -<br>0,1 | D <sub>98</sub><br>%          | 57,<br>9                         | ± | 2,1                              | 58,<br>9 | ± | 2,5      | -1,0                 | -<br>1,7 |  |  |                               |                                |
| D <sub>95</sub><br>% | 68,<br>9                     | ± | 0,3 | 68,<br>7 | ±                    | 0,5      | 0,2  | 0,3      | D <sub>95</sub><br>%          | 58,<br>9                         | ± | 1,7                              | 59,<br>4 | ± | 2,4      | -0,6                 | -<br>0,9 |  |  |                               |                                |
| D <sub>50</sub><br>% | 70,<br>5                     | ± | 0,6 | 70,<br>4 | ±                    | 0,3      | 0,1  | 0,1      | D <sub>50</sub><br>%          | 62,<br>8                         | ± | 2,3                              | 63,<br>6 | ± | 3,1      | -0,8                 | -<br>1,2 |  |  |                               |                                |
| D <sub>2%</sub>      | 71,<br>9                     | ± | 0,7 | 72,<br>5 | ±                    | 0,5      | -0,6 | -<br>0,8 | D <sub>2%</sub>               | 70,<br>0                         | ± | 1,6                              | 70,<br>8 | ± | 1,9      | -0,8                 | -<br>1,2 |  |  |                               |                                |
| D <sub>1%</sub>      | 72,<br>2                     | ± | 0,7 | 72,<br>7 | ±                    | 0,5      | -0,6 | -<br>0,8 | D <sub>1%</sub>               | 70,<br>5                         | ± | 1,4                              | 71,<br>3 | ± | 1,7      | -0,8                 | -<br>1,1 |  |  |                               |                                |
| D <sub>mean</sub>    | 70,<br>4                     | ± | 0,5 | 70,<br>4 | ±                    | 0,3      | 0,0  | 0,0      | D <sub>mean</sub>             | 63,<br>4                         | ± | 1,9                              | 64,<br>2 | ± | 2,2      | -0,8                 | -<br>1,3 |  |  |                               |                                |
| D <sub>min</sub>     | 55,<br>8                     | ± | 7,8 | 57,<br>7 | ±                    | 11,<br>1 | -1,9 | -<br>3,3 | D <sub>min</sub>              | 43,<br>8                         | ± | 11,<br>2                         | 39,<br>3 | ± | 18,<br>7 | 4,5                  | 11,<br>4 |  |  |                               |                                |
| D <sub>max</sub>     | 74,<br>6                     | ± | 1,4 | 74,<br>7 | ±                    | 1,2      | -0,1 | -<br>0,1 | D <sub>max</sub>              | 74,<br>2                         | ± | 1,6                              | 74,<br>4 | ± | 1,8      | -0,3                 | -<br>0,3 |  |  |                               |                                |
|                      | PTV <sub>ID_1,8Gy(RBE)</sub> |   |     |          |                      |          |      |          |                               | PTV <sub>LD_1,7-2,1Gy(RBE)</sub> |   |                                  |          |   |          |                      |          |  |  |                               |                                |
| D <sub>99</sub><br>% | 58,<br>3                     | ± | 1,7 | 59,<br>1 | ±                    | 2,6      | -0,9 | -<br>1,5 | D <sub>99</sub><br>%          | 52,<br>8                         | ± | 1,0                              | 52,<br>9 | ± | 5,7      | -0,1                 | -<br>0,3 |  |  |                               |                                |
| D <sub>98</sub><br>% | 58,<br>9                     | ± | 1,7 | 59,<br>5 | ±                    | 2,6      | -0,6 | -<br>1,0 | D <sub>98</sub><br>%          | 53,<br>4                         | ± | 0,9                              | 53,<br>8 | ± | 3,8      | -0,4                 | -<br>0,8 |  |  |                               |                                |
| D <sub>95</sub><br>% | 59,<br>8                     | ± | 1,8 | 60,<br>1 | ±                    | 2,6      | -0,4 | -<br>0,6 | D <sub>95</sub><br>%          | 54,<br>2                         | ± | 0,9                              | 55,<br>3 | ± | 0,3      | -1,1                 | -<br>2,0 |  |  |                               |                                |
| D <sub>50</sub><br>% | 69,<br>1                     | ± | 2,7 | 69,<br>0 | ±                    | 2,6      | 0,0  | 0,0      | D <sub>50</sub><br>%          | 56,<br>7                         | ± | 1,1                              | 57,<br>4 | ± | 0,8      | -0,7                 | -<br>1,3 |  |  |                               |                                |
| D <sub>2%</sub>      | 71,<br>8                     | ± | 0,8 | 72,<br>2 | ±                    | 0,4      | -0,4 | -<br>0,6 | D <sub>2%</sub>               | 68,<br>6                         | ± | 3,5                              | 68,<br>9 | ± | 3,7      | -0,3                 | -<br>0,4 |  |  |                               |                                |
| D <sub>1%</sub>      | 72,<br>0                     | ± | 0,8 | 72,<br>5 | ±                    | 0,5      | -0,5 | -<br>0,7 | D <sub>1%</sub>               | 69,<br>5                         | ± | 2,8                              | 69,<br>7 | ± | 3,1      | -0,3                 | -<br>0,4 |  |  |                               |                                |
| D <sub>mean</sub>    | 67,<br>4                     | ± | 1,8 | 67,<br>7 | ±                    | 1,8      | -0,3 | -<br>0,5 | D <sub>mean</sub>             | 58,<br>5                         | ± | 1,9                              | 59,<br>3 | ± | 1,7      | -0,7                 | -<br>1,2 |  |  |                               |                                |

|                                    |      |   |      |      |   |      |      |      |                                        |      |   |     |      |   |      |      |      |
|------------------------------------|------|---|------|------|---|------|------|------|----------------------------------------|------|---|-----|------|---|------|------|------|
| <b>D<sub>mi</sub><sub>n</sub></b>  | 43,7 | ± | 12,4 | 39,6 | ± | 19,3 | 4,0  | 10,2 | <b>D<sub>mi</sub><sub>n</sub></b>      | 35,9 | ± | 6,1 | 33,6 | ± | 14,0 | 2,4  | 7,0  |
| <b>D<sub>ma</sub><sub>x</sub></b>  | 74,9 | ± | 1,6  | 74,9 | ± | 1,3  | 0,1  | 0,1  | <b>D<sub>ma</sub><sub>x</sub></b>      | 74,5 | ± | 2,3 | 73,8 | ± | 1,3  | 0,7  | 1,0  |
| <b>PTV<sub>LD_1,7Gy(RBE)</sub></b> |      |   |      |      |   |      |      |      | <b>PTV<sub>LD_1,7-1,8Gy(RBE)</sub></b> |      |   |     |      |   |      |      |      |
| <b>D<sub>99</sub>%</b>             | 54,4 | ± | 1,2  | 54,8 | ± | 2,7  | -0,3 | -0,6 | <b>D<sub>99</sub>%</b>                 | 53,1 | ± | 1,2 | 54,1 | ± | 3,2  | -1,0 | -1,8 |
| <b>D<sub>98</sub>%</b>             | 55,4 | ± | 1,2  | 55,6 | ± | 1,0  | -0,2 | -0,4 | <b>D<sub>98</sub>%</b>                 | 54,4 | ± | 0,7 | 54,9 | ± | 2,2  | -0,4 | -0,8 |
| <b>D<sub>95</sub>%</b>             | 56,2 | ± | 1,3  | 56,2 | ± | 1,1  | 0,0  | 0,0  | <b>D<sub>95</sub>%</b>                 | 55,9 | ± | 0,4 | 55,7 | ± | 1,1  | 0,2  | 0,4  |
| <b>D<sub>50</sub>%</b>             | 63,9 | ± | 4,8  | 64,8 | ± | 4,8  | -1,0 | -1,5 | <b>D<sub>50</sub>%</b>                 | 58,3 | ± | 1,2 | 58,5 | ± | 2,0  | -0,1 | -0,2 |
| <b>D<sub>2%</sub></b>              | 71,6 | ± | 0,8  | 72,0 | ± | 0,4  | -0,4 | -0,5 | <b>D<sub>2%</sub></b>                  | 66,3 | ± | 1,6 | 69,0 | ± | 1,4  | -2,7 | -3,9 |
| <b>D<sub>1%</sub></b>              | 71,9 | ± | 0,8  | 72,4 | ± | 0,4  | -0,5 | -0,7 | <b>D<sub>1%</sub></b>                  | 67,5 | ± | 1,4 | 69,8 | ± | 1,2  | -2,3 | -3,3 |
| <b>D<sub>mean</sub></b>            | 63,9 | ± | 2,4  | 64,4 | ± | 2,2  | -0,5 | -0,7 | <b>D<sub>mean</sub></b>                | 58,9 | ± | 1,2 | 59,6 | ± | 1,7  | -0,8 | -1,3 |
| <b>D<sub>mi</sub><sub>n</sub></b>  | 34,5 | ± | 8,0  | 30,4 | ± | 17,0 | 4,1  | 13,4 | <b>D<sub>mi</sub><sub>n</sub></b>      | 34,5 | ± | 8,4 | 27,1 | ± | 18,5 | 7,4  | 27,4 |
| <b>D<sub>ma</sub><sub>x</sub></b>  | 75,1 | ± | 2,1  | 74,8 | ± | 1,3  | 0,3  | 0,4  | <b>D<sub>ma</sub><sub>x</sub></b>      | 73,5 | ± | 2,4 | 74,4 | ± | 1,8  | -0,8 | -1,1 |

Table S2: Homogeneity and conformity index for IMPT and VMAT plans and relative difference.

|                                  | Protons |   |      | Photons |   |      | p-X  |         |
|----------------------------------|---------|---|------|---------|---|------|------|---------|
| PTV <sub>HD</sub>                | Mean    |   |      | Mean    |   |      | % Δ  | p-value |
| HI                               | 0,05    | ± | 0,01 | 0,06    | ± | 0,01 | -12% | 0,1277  |
| CI                               | 1,30    | ± | 0,10 | 1,46    | ± | 0,16 | -11% | 0       |
| PTV <sub>ID_1,8Gy(RBE)</sub>     |         |   |      |         |   |      |      |         |
| HI                               | 0,19    | ± | 0,03 | 0,18    | ± | 0,04 | 2%   | 0,2838  |
| CI                               | 1,86    | ± | 0,47 | 1,97    | ± | 0,62 | -6%  | 0,0063  |
| PTV <sub>LD_1,7Gy(RBE)</sub>     |         |   |      |         |   |      |      |         |
| HI                               | 0,26    | ± | 0,03 | 0,26    | ± | 0,03 | 0%   | 0,9029  |
| CI                               | 1,45    | ± | 0,09 | 1,66    | ± | 0,35 | -13% | 0       |
| PTV <sub>LD_1,8-2,1Gy(RBE)</sub> |         |   |      |         |   |      |      |         |
| HI                               | 0,19    | ± | 0,03 | 0,19    | ± | 0,04 | 2%   | 0,3261  |
| CI                               | 4,90    | ± | 2,00 | 5,21    | ± | 2,29 | -6%  | 0,0044  |
| PTV <sub>LD_1,7-1,8Gy(RBE)</sub> |         |   |      |         |   |      |      |         |
| HI                               | 0,27    | ± | 0,07 | 0,26    | ± | 0,10 | 2%   | 0,6071  |
| CI                               | 2,74    | ± | 0,88 | 3,35    | ± | 1,53 | -20% | 0,001   |
| PTV <sub>LD_1,7-1,8Gy(RBE)</sub> |         |   |      |         |   |      |      |         |
| HI                               | 0,20    | ± | 0,03 | 0,24    | ± | 0,05 | -18% | 0,0439  |
| CI                               | 4,21    | ± | 1,98 | 4,69    | ± | 2,32 | -11% | 0,0001  |

Table S3: Dose-volume points for a list of significant OAR for NPC patients. The dose-constraint used for plan optimization (internal protocol) is reported below each OAR.

|             |  |             | p [GyE] |      | X [GyE] |      | Δ(p-X) |       |
|-------------|--|-------------|---------|------|---------|------|--------|-------|
|             |  |             | Median  | IR   | Median  | IR   | [GyE]  | [%]   |
| Temp.Lobe R |  | D99         | 0,1     | 0,0  | 2,1     | 1,2  | -2,0   | -97,1 |
| D01< 65 Gy  |  | D50         | 0,5     | 1,1  | 9,3     | 6,5  | -8,8   | -95,0 |
|             |  | D02         | 53,1    | 12,7 | 50,2    | 13,5 | 3,0    | 5,9   |
|             |  | D01         | 59,0    | 9,8  | 57,1    | 13,1 | 2,0    | 3,5   |
|             |  | DoseMax     | 70,6    | 4,7  | 69,9    | 5,4  | 0,7    | 1,0   |
|             |  | DoseAverage | 7,4     | 5,1  | 13,0    | 6,5  | -5,6   | -43,1 |
|             |  | DoseMin     | 0,1     | 0,0  | 1,7     | 1,1  | -1,7   | -97,1 |
| Temp.Lobe L |  | D99         | 0,1     | 0,1  | 2,1     | 1,1  | -2,0   | -96,6 |
| D01< 65 Gy  |  | D50         | 0,6     | 1,6  | 8,1     | 7,1  | -7,4   | -92,1 |
|             |  | D02         | 51,9    | 23,7 | 52,6    | 22,0 | -0,7   | -1,4  |
|             |  | D01         | 56,1    | 18,9 | 58,6    | 18,6 | -2,5   | -4,2  |
|             |  | DoseMax     | 70,8    | 6,3  | 70,6    | 7,0  | 0,2    | 0,2   |
|             |  | DoseAverage | 7,5     | 7,2  | 12,3    | 7,5  | -4,9   | -39,5 |
|             |  | DoseMin     | 0,1     | 0,1  | 1,8     | 0,9  | -1,8   | -96,4 |
| Brain       |  | D99         | 0,0     | 0,1  | 0,5     | 0,2  | -0,5   | -97,8 |
| D01< 65 Gy  |  | D50         | 0,1     | 0,0  | 2,3     | 1,3  | -2,1   | -94,7 |
|             |  | D02         | 26,7    | 23,3 | 40,3    | 12,3 | -13,6  | -33,8 |
|             |  | D01         | 38,9    | 24,9 | 45,9    | 13,7 | -7,1   | -15,4 |
|             |  | DoseMax     | 72,6    | 2,8  | 72,6    | 2,3  | 0,0    | 0,0   |
|             |  | DoseAverage | 1,5     | 1,5  | 7,5     | 3,5  | -6,0   | -80,0 |
|             |  | DoseMin     | 0,0     | 0,0  | 0,4     | 0,1  | -0,4   | -97,4 |
| Brainstem   |  | D99         | 0,2     | 0,1  | 7,3     | 7,6  | -7,1   | -97,3 |
| D01< 54 Gy  |  | D50         | 6,0     | 5,6  | 30,2    | 11,0 | -24,2  | -80,2 |
|             |  | D02         | 45,6    | 15,4 | 48,9    | 5,7  | -3,3   | -6,8  |
|             |  | D01         | 49,0    | 13,9 | 50,2    | 5,3  | -1,2   | -2,4  |
|             |  | DoseMax     | 60,4    | 12,6 | 55,7    | 6,2  | 4,8    | 8,6   |
|             |  | DoseAverage | 11,4    | 7,2  | 28,4    | 9,2  | -16,9  | -59,7 |
|             |  | DoseMin     | 0,1     | 0,1  | 6,9     | 6,1  | -6,8   | -98,2 |
| Spinal Cord |  | D99         | 0,0     | 0,0  | 2,1     | 9,3  | -2,1   | -99,5 |
| D01< 45 Gy  |  | D50         | 0,2     | 0,4  | 30,0    | 3,9  | -29,8  | -99,3 |
|             |  | D02         | 11,4    | 10,9 | 35,8    | 3,6  | -24,4  | -68,1 |
|             |  | D01         | 14,0    | 13,7 | 36,1    | 3,9  | -22,1  | -61,2 |
|             |  | DoseMax     | 25,9    | 18,3 | 37,8    | 4,8  | -11,9  | -31,4 |
|             |  | DoseAverage | 1,8     | 1,4  | 25,7    | 4,7  | -23,9  | -93,1 |
|             |  | DoseMin     | 0,0     | 0,0  | 2,0     | 8,3  | -2,0   | -99,5 |

|                            |  |             |      |      |      |      |       |       |
|----------------------------|--|-------------|------|------|------|------|-------|-------|
| <b>Opt.Nerve L</b>         |  | D99         | 0,9  | 1,0  | 4,8  | 3,0  | -3,8  | -80,9 |
| <b>D01&lt; 55 Gy</b>       |  | D50         | 6,6  | 9,8  | 8,9  | 9,0  | -2,3  | -26,1 |
|                            |  | D02         | 20,3 | 21,9 | 19,8 | 24,7 | 0,5   | 2,6   |
|                            |  | D01         | 21,0 | 22,2 | 20,5 | 24,4 | 0,6   | 2,7   |
|                            |  | DoseMax     | 23,8 | 23,3 | 21,1 | 23,9 | 2,7   | 12,9  |
|                            |  | DoseAverage | 7,4  | 10,1 | 10,1 | 11,4 | -2,8  | -27,4 |
|                            |  | DoseMin     | 0,8  | 0,8  | 4,5  | 2,9  | -3,8  | -83,4 |
| <b>Opt.Nerve R</b>         |  | D99         | 0,9  | 0,8  | 4,6  | 2,9  | -3,7  | -80,6 |
| <b>D01&lt; 55 Gy</b>       |  | D50         | 6,2  | 5,9  | 9,0  | 6,8  | -2,8  | -31,3 |
|                            |  | D02         | 18,8 | 20,0 | 19,0 | 20,4 | -0,2  | -1,2  |
|                            |  | D01         | 19,8 | 21,2 | 19,5 | 21,1 | 0,3   | 1,4   |
|                            |  | DoseMax     | 21,5 | 23,4 | 21,0 | 22,4 | 0,5   | 2,2   |
|                            |  | DoseAverage | 7,2  | 7,2  | 10,2 | 6,9  | -3,1  | -29,8 |
|                            |  | DoseMin     | 0,8  | 0,7  | 4,5  | 2,8  | -3,8  | -83,4 |
| <b>Optic Chiasm</b>        |  | D99         | 1,2  | 2,9  | 5,3  | 3,3  | -4,1  | -77,4 |
| <b>D01&lt; 55 Gy</b>       |  | D50         | 4,7  | 10,5 | 7,2  | 9,8  | -2,5  | -35,1 |
|                            |  | D02         | 11,3 | 23,1 | 10,4 | 29,6 | 0,9   | 8,2   |
|                            |  | D01         | 11,7 | 24,7 | 10,6 | 29,9 | 1,1   | 10,2  |
|                            |  | DoseMax     | 14,4 | 31,5 | 11,0 | 29,8 | 3,4   | 30,8  |
|                            |  | DoseAverage | 5,3  | 10,6 | 7,6  | 13,1 | -2,3  | -30,3 |
|                            |  | DoseMin     | 1,1  | 2,8  | 5,2  | 3,2  | -4,2  | -79,6 |
| <b>Supraglottic Larynx</b> |  | D99         | 17,4 | 19,3 | 31,6 | 10,6 | -14,3 | -45,2 |
| <b>Daverage &lt; 55 Gy</b> |  | D50         | 41,5 | 12,2 | 41,8 | 8,2  | -0,4  | -0,9  |
|                            |  | D02         | 59,2 | 7,9  | 59,9 | 7,7  | -0,7  | -1,2  |
|                            |  | D01         | 60,8 | 8,9  | 62,1 | 8,0  | -1,3  | -2,1  |
|                            |  | DoseMax     | 67,3 | 10,9 | 67,1 | 8,8  | 0,2   | 0,3   |
|                            |  | DoseAverage | 40,2 | 9,1  | 43,4 | 8,7  | -3,2  | -7,3  |
|                            |  | DoseMin     | 13,0 | 19,2 | 30,5 | 10,6 | -17,5 | -57,4 |
| <b>Glottic Larynx</b>      |  | D99         | 10,9 | 11,4 | 28,9 | 8,1  | -18,1 | -62,5 |
| <b>Daverage &lt; 45 Gy</b> |  | D50         | 20,8 | 14,1 | 35,2 | 7,1  | -14,4 | -40,8 |
|                            |  | D02         | 40,4 | 13,9 | 46,3 | 9,4  | -6,0  | -12,9 |
|                            |  | D01         | 43,3 | 13,5 | 47,2 | 9,6  | -3,9  | -8,2  |
|                            |  | DoseMax     | 50,8 | 12,9 | 52,0 | 9,9  | -1,2  | -2,3  |
|                            |  | DoseAverage | 21,9 | 13,0 | 35,9 | 8,1  | -13,9 | -38,8 |
|                            |  | DoseMin     | 9,7  | 11,7 | 28,2 | 8,6  | -18,5 | -65,7 |
| <b>Oral Cavity</b>         |  | D99         | 1,5  | 1,9  | 20,7 | 5,7  | -19,2 | -92,9 |
| <b>Daverage &lt; 40 Gy</b> |  | D50         | 38,2 | 10,1 | 34,8 | 6,2  | 3,4   | 9,6   |
|                            |  | D02         | 69,8 | 3,7  | 69,7 | 2,8  | 0,1   | 0,1   |
|                            |  | D01         | 70,4 | 2,0  | 70,6 | 2,1  | -0,2  | -0,3  |
|                            |  | DoseMax     | 72,0 | 1,2  | 72,3 | 0,9  | -0,3  | -0,4  |

|                                       |  |             |      |      |      |      |       |       |
|---------------------------------------|--|-------------|------|------|------|------|-------|-------|
|                                       |  | DoseAverage | 36,5 | 6,8  | 39,3 | 4,9  | -2,8  | -7,1  |
|                                       |  | DoseMin     | 0,6  | 0,6  | 19,3 | 5,9  | -18,7 | -96,7 |
| <b>Sup PCM</b>                        |  | D99         | 57,7 | 10,1 | 57,6 | 9,6  | 0,1   | 0,2   |
| <b>D<sub>average</sub> &lt; 50 Gy</b> |  | D50         | 69,6 | 6,1  | 69,4 | 2,9  | 0,2   | 0,3   |
|                                       |  | D02         | 71,4 | 1,2  | 71,8 | 1,0  | -0,4  | -0,6  |
|                                       |  | D01         | 71,6 | 1,3  | 71,9 | 1,0  | -0,3  | -0,5  |
|                                       |  | DoseMax     | 72,3 | 1,4  | 72,5 | 1,1  | -0,2  | -0,3  |
|                                       |  | DoseAverage | 67,8 | 5,3  | 67,8 | 4,8  | 0,0   | 0,0   |
|                                       |  | DoseMin     | 54,7 | 10,1 | 54,6 | 10,3 | 0,2   | 0,3   |
| <b>Mid PCM</b>                        |  | D99         | 33,3 | 18,6 | 48,8 | 8,6  | -15,6 | -31,9 |
| <b>D<sub>average</sub> &lt; 50 Gy</b> |  | D50         | 57,7 | 9,9  | 59,6 | 11,8 | -1,9  | -3,3  |
|                                       |  | D02         | 70,3 | 7,6  | 71,1 | 5,7  | -0,8  | -1,1  |
|                                       |  | D01         | 70,9 | 5,6  | 71,3 | 3,2  | -0,5  | -0,7  |
|                                       |  | DoseMax     | 71,9 | 2,4  | 72,3 | 2,2  | -0,4  | -0,6  |
|                                       |  | DoseAverage | 56,1 | 9,8  | 60,4 | 8,7  | -4,3  | -7,1  |
|                                       |  | DoseMin     | 29,3 | 18,8 | 47,1 | 8,3  | -17,8 | -37,8 |
| <b>Inf PCM</b>                        |  | D99         | 4,8  | 11,0 | 41,6 | 7,5  | -36,8 | -88,5 |
| <b>D<sub>average</sub> &lt; 50 Gy</b> |  | D50         | 35,5 | 17,4 | 48,1 | 7,2  | -12,6 | -26,2 |
|                                       |  | D02         | 57,0 | 8,4  | 59,0 | 9,2  | -2,1  | -3,5  |
|                                       |  | D01         | 58,3 | 9,7  | 60,1 | 11,2 | -1,9  | -3,1  |
|                                       |  | DoseMax     | 62,9 | 11,1 | 65,2 | 12,0 | -2,3  | -3,6  |
|                                       |  | DoseAverage | 33,1 | 14,3 | 49,2 | 7,0  | -16,1 | -32,7 |
|                                       |  | DoseMin     | 3,1  | 8,1  | 40,6 | 7,1  | -37,5 | -92,3 |
| <b>Esophagus</b>                      |  | D99         | 0,5  | 1,9  | 29,8 | 18,1 | -29,3 | -98,2 |
| <b>D<sub>average</sub> &lt; 35 Gy</b> |  | D50         | 15,7 | 18,0 | 40,2 | 10,5 | -24,6 | -61,0 |
| <b>V<sub>45Gy</sub> &lt;= 33%</b>     |  | D02         | 46,0 | 20,0 | 50,2 | 9,1  | -4,2  | -8,4  |
| <b>V<sub>54Gy</sub> &lt;= 15%</b>     |  | D01         | 48,8 | 19,7 | 51,1 | 9,0  | -2,4  | -4,6  |
|                                       |  | DoseMax     | 53,4 | 18,9 | 53,9 | 7,3  | -0,5  | -1,0  |
|                                       |  | DoseAverage | 19,3 | 12,5 | 39,3 | 10,5 | -20,0 | -50,9 |
|                                       |  | DoseMin     | 0,3  | 1,1  | 29,1 | 19,3 | -28,9 | -99,1 |
| <b>Parotid R</b>                      |  | D99         | 7,7  | 3,4  | 20,9 | 7,7  | -13,2 | -63,2 |
| <b>D<sub>average</sub> &lt; 26 Gy</b> |  | D50         | 24,8 | 5,0  | 37,8 | 11,3 | -13,0 | -34,3 |
| <b>V<sub>30Gy</sub> &lt;= 50%</b>     |  | D02         | 65,9 | 13,8 | 68,4 | 12,0 | -2,5  | -3,6  |
|                                       |  | D01         | 68,1 | 13,1 | 69,5 | 11,3 | -1,4  | -2,0  |
|                                       |  | DoseMax     | 71,3 | 8,8  | 71,7 | 6,1  | -0,4  | -0,6  |
|                                       |  | DoseAverage | 29,6 | 5,7  | 41,3 | 9,6  | -11,7 | -28,4 |
|                                       |  | DoseMin     | 6,3  | 3,1  | 17,2 | 7,2  | -10,9 | -63,6 |
| <b>Parotid L</b>                      |  | D99         | 7,6  | 3,6  | 24,3 | 9,8  | -16,7 | -68,7 |
| <b>D<sub>average</sub> &lt; 26 Gy</b> |  | D50         | 25,5 | 8,6  | 41,3 | 21,7 | -15,8 | -38,2 |
| <b>V<sub>30Gy</sub> &lt;= 50%</b>     |  | D02         | 69,5 | 11,5 | 70,1 | 10,0 | -0,6  | -0,8  |

|                                          |  |             |      |      |      |      |       |       |
|------------------------------------------|--|-------------|------|------|------|------|-------|-------|
|                                          |  | D01         | 70,2 | 11,1 | 70,6 | 8,0  | -0,4  | -0,5  |
|                                          |  | DoseMax     | 71,7 | 3,3  | 72,0 | 1,9  | -0,3  | -0,5  |
|                                          |  | DoseAverage | 31,3 | 8,3  | 43,8 | 14,0 | -12,5 | -28,5 |
|                                          |  | DoseMin     | 6,1  | 3,8  | 20,4 | 8,9  | -14,3 | -70,2 |
| <b>Cochlea R</b>                         |  | D99         | 17,9 | 16,1 | 23,8 | 14,2 | -5,9  | -24,9 |
| <b>D<sub>average</sub> &lt; 35-45 Gy</b> |  | D50         | 30,1 | 15,8 | 31,2 | 12,8 | -1,1  | -3,4  |
|                                          |  | D02         | 46,8 | 17,4 | 45,5 | 19,7 | 1,4   | 3,0   |
|                                          |  | D01         | 48,1 | 17,9 | 46,7 | 19,5 | 1,4   | 3,0   |
|                                          |  | DoseMax     | 51,7 | 19,6 | 47,9 | 21,3 | 3,8   | 7,9   |
|                                          |  | DoseAverage | 30,7 | 15,7 | 32,4 | 12,8 | -1,8  | -5,5  |
|                                          |  | DoseMin     | 15,3 | 15,1 | 23,8 | 14,2 | -8,5  | -35,7 |
| <b>Cochlea L</b>                         |  | D99         | 14,0 | 19,1 | 24,2 | 17,6 | -10,2 | -42,1 |
| <b>D<sub>average</sub> &lt; 35-45 Gy</b> |  | D50         | 26,1 | 26,9 | 32,6 | 20,0 | -6,5  | -19,9 |
|                                          |  | D02         | 45,3 | 27,7 | 49,0 | 28,6 | -3,7  | -7,6  |
|                                          |  | D01         | 47,0 | 27,5 | 50,6 | 29,3 | -3,6  | -7,2  |
|                                          |  | DoseMax     | 51,0 | 26,4 | 52,5 | 30,7 | -1,5  | -2,8  |
|                                          |  | DoseAverage | 26,8 | 26,2 | 33,0 | 19,7 | -6,2  | -18,9 |
|                                          |  | DoseMin     | 12,7 | 19,4 | 24,4 | 17,0 | -11,8 | -48,1 |
| <b>Thyroid</b>                           |  | D99         | 21,9 | 14,7 | 36,9 | 12,8 | -15,0 | -40,6 |
| <b>D<sub>average</sub> &lt; 45 Gy</b>    |  | D50         | 48,8 | 3,3  | 54,3 | 3,1  | -5,5  | -10,1 |
|                                          |  | D02         | 60,0 | 8,2  | 60,8 | 10,1 | -0,8  | -1,3  |
|                                          |  | D01         | 60,7 | 10,4 | 61,4 | 11,1 | -0,8  | -1,2  |
|                                          |  | DoseMax     | 64,0 | 11,1 | 62,9 | 11,9 | 1,1   | 1,7   |
|                                          |  | DoseAverage | 46,8 | 3,6  | 52,5 | 5,1  | -5,8  | -11,0 |
|                                          |  | DoseMin     | 11,9 | 16,9 | 33,9 | 14,1 | -22,0 | -64,8 |
| <b>Mandible</b>                          |  | D99         | 1,0  | 2,5  | 21,8 | 7,7  | -20,8 | -95,6 |
| <b>D01 &lt; 70 Gy</b>                    |  | D50         | 27,1 | 9,4  | 39,4 | 7,2  | -12,3 | -31,3 |
|                                          |  | D02         | 60,6 | 12,7 | 64,8 | 9,6  | -4,3  | -6,6  |
|                                          |  | D01         | 65,1 | 12,4 | 66,7 | 8,8  | -1,6  | -2,4  |
|                                          |  | DoseMax     | 70,9 | 5,2  | 71,4 | 2,4  | -0,5  | -0,7  |
|                                          |  | DoseAverage | 28,7 | 8,4  | 40,4 | 5,6  | -11,8 | -29,1 |
|                                          |  | DoseMin     | 0,7  | 0,5  | 18,8 | 6,6  | -18,2 | -96,5 |

Table S4: Calculated CTS values for the different groups.

|                         | <b>ALL<br/>(50 pts)</b> | <b>N0<br/>(8 pts)</b> | <b>N1<br/>(14 pts)</b> | <b>N2N3<br/>(28 pts)</b> | <b>T1T2<br/>(27 pts)</b> | <b>T3T4<br/>(23 pts)</b> |
|-------------------------|-------------------------|-----------------------|------------------------|--------------------------|--------------------------|--------------------------|
| <b>Eligible</b>         | 6.3 ± 1.4               | 6.8 ± 0               | 6.4 ± 0.5              | 6.3 ± 1.8                | 6.8 ± 1.1                | 6.1 ± 1.6                |
| <b>Not<br/>Eligible</b> | 3.5 ± 1.4               | 3.3 ± 1.7             | 3.3 ± 0.9              | 3.6 ± 1.6                | 3.2 ± 1.3                | 4.2 ± 1.6                |

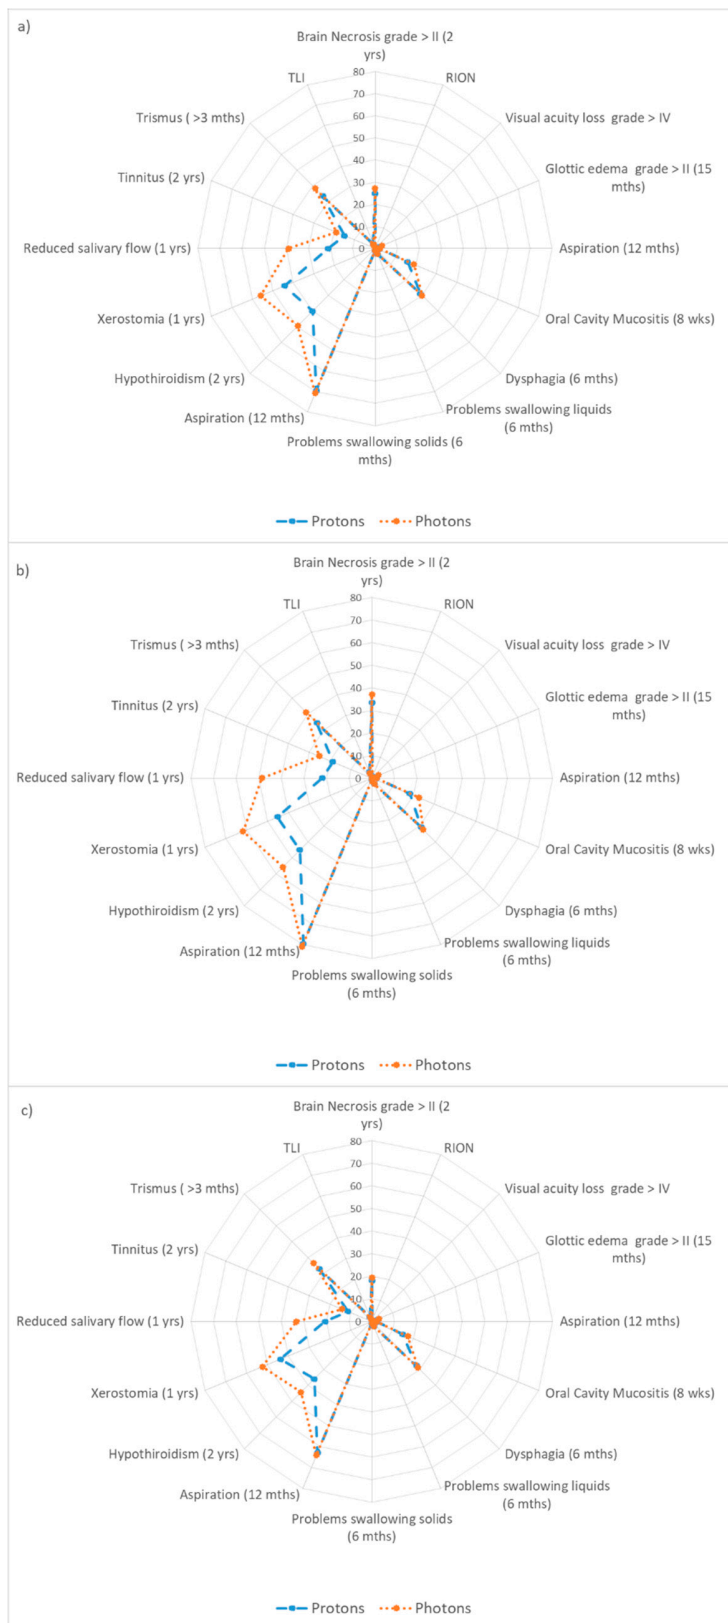

Figure S1: NTCP values for the 16 models for the full patient cohort (a); patients eligible for PT (b); patients not eligible for PT (c).
